# Supplementary material
Source: PubMed Central journal article supplement (PMC9276534)
Supplement: mmc1.pdf [file mmc1.pdf]

# THE LANCET

## Global Health

### Supplementary appendix

This appendix formed part of the original submission and has been peer reviewed. We post it as supplied by the authors.

Supplement to: Cabore JW, Karamagi HC, Kipruto HK, et al. COVID-19 in the 47 countries of the WHO African region: a modelling analysis of past trends and future patterns. *Lancet Glob Health* 2022; published online June 1. [https://doi.org/10.1016/S2214-109X\(22\)00233-9](https://doi.org/10.1016/S2214-109X(22)00233-9).

## **Supplementary Appendix**

**S1- List of countries in the WHO Africa Region by income classifications**

**S2- Parameter description and initialization**

**S3- Model development for the SEIRD Partially Observed Markov Process**

**S4- Regional analysis Tables**

## S1- List of countries in the WHO Africa Region by income classifications

**Table S1: Classification of the WHO AFRO countries according to income levels**

| High / Upper Middle Income | Lower-middle Income         | Low Income               |
|----------------------------|-----------------------------|--------------------------|
| Seychelles (High Income)   | Angola                      | Benin                    |
| Algeria                    | Cameroon                    | Burkina Faso             |
| Botswana                   | Cabo Verde                  | Burundi                  |
| Equatorial Guinea          | Comoros                     | Central African Republic |
| Gabon                      | Congo, Rep.                 | Chad                     |
| Mauritius                  | Cote d'Ivoire               | Congo, Dem. Rep.         |
| Namibia                    | Eswatini                    | Eritrea                  |
| South Africa               | Ghana                       | Ethiopia                 |
|                            | Kenya                       | Gambia, The              |
|                            | Lesotho                     | Guinea                   |
|                            | Mauritania                  | Guinea-Bissau            |
|                            | Nigeria                     | Liberia                  |
|                            | Sao Tome and Principe       | Madagascar               |
|                            | Senegal                     | Malawi                   |
|                            | Zambia                      | Mali                     |
|                            | Zimbabwe                    | Mozambique               |
|                            | United Republic of Tanzania | Niger                    |
|                            |                             | Rwanda                   |
|                            |                             | Sierra Leone             |
|                            |                             | South Sudan              |
|                            |                             | Togo                     |
|                            |                             | Uganda                   |

## SUPPLEMENTARY APPENDIX 2: Parameter description and initialization

We utilized the parameters in the table below to fit into the model for the different states

**Table S2. Parameter description and initialization**

| State       | Description                                                                                                                                                                      | Notation          | Data description                                                                                                                                                                                                                                                                                                   | Data                                                                                                                                                                                                                                                                                                                                                                                                                                                                                                                                                                                                                                                                                                                                                                                                | Source                                                                                                                                                                                                                                                                                               |
|-------------|----------------------------------------------------------------------------------------------------------------------------------------------------------------------------------|-------------------|--------------------------------------------------------------------------------------------------------------------------------------------------------------------------------------------------------------------------------------------------------------------------------------------------------------------|-----------------------------------------------------------------------------------------------------------------------------------------------------------------------------------------------------------------------------------------------------------------------------------------------------------------------------------------------------------------------------------------------------------------------------------------------------------------------------------------------------------------------------------------------------------------------------------------------------------------------------------------------------------------------------------------------------------------------------------------------------------------------------------------------------|------------------------------------------------------------------------------------------------------------------------------------------------------------------------------------------------------------------------------------------------------------------------------------------------------|
| Susceptible | Total population split between the immunised and not-immunised                                                                                                                   | $N$               | Total population                                                                                                                                                                                                                                                                                                   | As per country totals                                                                                                                                                                                                                                                                                                                                                                                                                                                                                                                                                                                                                                                                                                                                                                               | Country census <sup>13</sup>                                                                                                                                                                                                                                                                         |
|             |                                                                                                                                                                                  | $\nu$             | Birthrates                                                                                                                                                                                                                                                                                                         | As per country                                                                                                                                                                                                                                                                                                                                                                                                                                                                                                                                                                                                                                                                                                                                                                                      | Estimated from Country census data <sup>13</sup>                                                                                                                                                                                                                                                     |
|             |                                                                                                                                                                                  | $\mu$             | Death rates                                                                                                                                                                                                                                                                                                        | As per country                                                                                                                                                                                                                                                                                                                                                                                                                                                                                                                                                                                                                                                                                                                                                                                      | Estimated from Country census data <sup>13</sup>                                                                                                                                                                                                                                                     |
|             |                                                                                                                                                                                  | $\varphi$         | Immunized population                                                                                                                                                                                                                                                                                               | As per country                                                                                                                                                                                                                                                                                                                                                                                                                                                                                                                                                                                                                                                                                                                                                                                      | From equation 1 (in the paper)                                                                                                                                                                                                                                                                       |
| Exposed     | Those who have gotten the virus but cannot transmit it to others yet. Consider different variants. The true identities of the variants to be given (alpha, beta, delta, omicron) | $\sigma_{ij}$     | Incubation periods for each of the variants                                                                                                                                                                                                                                                                        | Wuhan Reference Strain: 5 days<br><br>Alpha: 3.5 days<br>Beta: 5 days<br>Delta: 4 days<br><br>Omicron: 3 <sup>1</sup> days                                                                                                                                                                                                                                                                                                                                                                                                                                                                                                                                                                                                                                                                          | Cheng et al., 2021; Homma et al., 2021; Snell et al., 2021 <sup>1-3</sup> ;                                                                                                                                                                                                                          |
| Infected    | Those who have the virus and are contagious                                                                                                                                      | $\lambda_{ij}(t)$ | The force of infection (dynamic series, fourier) = infection rate (contact rate * transmission probability. Infection rates for the different variants for both immunised and not-immunised. Differences in the severities based on the variant in question and immunization status. The periodicity of the waves. | Immunization reduces severe infections by 80 – 87.5%<br><br>No significant level of severity among the variants<br><br>Proportion of the cases that are from immunied persons is 21%<br>Reduction of risk of infection due to immunization is 68.97%<br>Reduction of mortality due to immunization is 86.50%<br><br>Reduction of re-infection due to immunization 90.40%<br><br>Transmissibility of strains:<br><br>Alpha strain is ~50% increase in comparison with the Wuhan reference (original) strain<br>Beta strain is 25% increase in transmissibility compared with the Wuhan reference (original) strain<br><br>Delta strain is 97% increase in transmissibility compared with the Wuhan reference (original) strain<br>Omicron has a transmission advantage of 189% (162-217%) over Delta | Akkiz, 2021; Jara et al., 2021; Levine-Tiefenbrun et al., 2021; Mahase, 2021; Marfe et al., 2021; Thompson et al., 2021; Tregoning et al., 2021; Vasireddy et al., 2021 <sup>4-10</sup> Kojima et al 2021 <sup>11</sup><br><br>Campel et al, 2021 <sup>14</sup><br>WHO update #6: 2022 <sup>15</sup> |
| Recovered   | Recoveries as function of the duration of illness                                                                                                                                | $\gamma_{ij}$     | Recovery rate = 1/infectious period. The infectious period to be considered under each of the identified variants for both immunised and not-immunised. The recovery period with respect to the severities.                                                                                                        | Recovery period: (Mild/ asymptomatic; Moderate, Severe, Critical)                                                                                                                                                                                                                                                                                                                                                                                                                                                                                                                                                                                                                                                                                                                                   | Cabore et al. (2020)                                                                                                                                                                                                                                                                                 |
|             |                                                                                                                                                                                  | $\epsilon_{ij}$   | Movement from the recovered to the susceptible.                                                                                                                                                                                                                                                                    | Immunized vs unimmunized:<br>Immunized persons have 2.8 days shorter recovery period if hospitalized                                                                                                                                                                                                                                                                                                                                                                                                                                                                                                                                                                                                                                                                                                | Baltas et al., 2021                                                                                                                                                                                                                                                                                  |
| Dead        | Number of COVID-19 related deaths                                                                                                                                                | $\omega_{ij}$     | COVID-19 related death with respect to disease severities and immunization status                                                                                                                                                                                                                                  | Immunization reduces deaths by 81-86.5% in real-world experiences<br><br>Death by disease severity:<br>Mild/asymptomatic:<br>Moderate<br>Severe<br>Critical                                                                                                                                                                                                                                                                                                                                                                                                                                                                                                                                                                                                                                         | Jara et al., 2021<br>Marfe et al., 2021;<br>Tregoning et al., 2021 <sup>5,8,9</sup><br><br>Cabore et al (2020)                                                                                                                                                                                       |

### SUPPLEMENTARY APPENDIX 3: Model development for the SEIRD Partially Observed Markov Process

The evolutionary process of Covid-19 cases data is modeled as a Partially Observed Markov Process (POMP) also called Hidden Markov Model.<sup>12</sup> A POMP is a statistical Markov Model in which the hidden states are assumed to have the Markov property and emit symbols or observations. For the compartment model (SEIRD), the hidden states are the number of individuals in the compartments.

From Figure 1 in the text, let  $S(t)$ ,  $E(t)$ ,  $I(t)$ ,  $R(t)$  and  $D(t)$  be the numbers of individuals within the respective compartment at time  $t$ . Let also  $n_{ij}$  be a stochastic counting process with the value at time  $t$  being the number of individuals transiting from compartment  $i$  to  $j$  during the interval  $[t_0, t)$ , where  $t_0$  is the starting point. Further, let  $n_{.i}$  and  $n_{.i}$  be the births and deaths, respectively, in compartment  $i$ . The infinitesimal increment probabilities specify the continuous-time Markov process. Writing  $\Delta n(t) = n(t+h) - n(t)$ , we therefore have:

$$\Pr[\Delta n_{.S_i}(t) = 1 | F_t] = \nu N(t)h + o(h) \quad (1)$$

For  $i = 1, 2$  for the not – immunized and immunized sub-models,

$$\Pr[\Delta n_{S_1S_2}(t) = 1 | F_t] = \varphi(t)N(t)h + o(h), \text{ transiting from the not-immunized to the immunized at time } t \quad (2)$$

$$\Pr[\Delta n_{S_i}(t) = 1 | F_t] = \mu S_i(t)h + o(h), \text{ general population mortality among the susceptible at time } t \quad (3)$$

$$\Pr[\Delta n_{S_jE_{ij}}(t) = 1 | F_t] = \sigma_{ij}S_i(t)h + o(h), \text{ with } j \in \{1, 2, 3, 4\} \text{ for exposure to the variants} \quad (4)$$

$$\Pr[\Delta n_{E_{ij}I_{ij}}(t) = 1 | F_t] = \lambda_{ij}(t)E_{ij}(t)h + o(h), \text{ with } j \in \{1, 2, 3, 4\} \text{ for different infection severity levels} \quad (5)$$

$$\Pr[\Delta n_{I_{ij}R_{ij}}(t) = 1 | F_t] = \gamma_{ij}I_{ij}(t)h + o(h), \text{ with } j \in \{1, 2\} \text{ for recovery differentials between the immunized and not immunized} \quad (6)$$

$$\Pr[\Delta n_{I_{ij}D_{ij}}(t) = 1 | F_t] = \omega_{ij}I_{ij}(t)h + o(h), \text{ with } j \in \{1, 2\} \text{ for COVID-19 mortality differentials between the immunized and not immunized} \quad (7)$$

$$\Pr[\Delta n_{R_{ij}S_i}(t) = 1 | F_t] = \varepsilon_{ij}R_{ij}(t)h + o(h), \text{ with } j \in \{1, 2\} \text{ for the different rates of moving from the recovered to susceptible among the immunized and not immunized groups} \quad (8)$$

Allowing for non-zero probability general population mortality in the compartments, we have:

$$\Pr[\Delta n_{E_{ij}}(t) = 1 | F_t] = \mu E_{ij}(t)h + o(h) \quad (9)$$

$$\Pr[\Delta n_{I_{ij}}(t) = 1 | F_t] = \mu I_{ij}(t)h + o(h) \quad (10)$$

$$\Pr[\Delta n_{R_{ij}}(t) = 1 | F_t] = \mu R_{ij}(t)h + o(h) \quad (11)$$

With the filtration  $F_t = \{S_i(u), E_{ij}(u), I_{ij}(u), R_{ij}(u), \text{ for all } 0 \leq u \leq t\}$  represents the history of the process up to time  $t$ . The counting processes governing Figure 1 are represented by the following identities:

$$\begin{aligned} \Delta S_1(t) &= \Delta n_{S_1} - \Delta n_{S_1 S_2} - \Delta n_{S_1 E_{1j}} - \Delta n_{S_1} \\ \Delta S_2(t) &= \Delta n_{S_1 S_2} + \Delta n_{R_{1j} S_2} + \Delta n_{R_{2j} S_2} - \Delta n_{S_2 E_{2j}} - \Delta n_{S_2} \\ \Delta E_{1j}(t) &= \Delta n_{S_1 E_{1j}} - \Delta n_{E_{1j} I_{1j}} - \Delta n_{E_{1j}} \\ \Delta E_{2j}(t) &= \Delta n_{S_2 E_{2j}} - \Delta n_{E_{2j} I_{2j}} - \Delta n_{E_{2j}} \\ \Delta I_{1j}(t) &= \Delta n_{E_{1j} I_{1j}} - \Delta n_{I_{1j} D_{1j}} - \Delta n_{I_{1j}} - \Delta n_{I_{1j} R_{1j}} \\ \Delta I_{2j}(t) &= \Delta n_{E_{2j} I_{2j}} - \Delta n_{I_{2j} D_{2j}} - \Delta n_{I_{2j}} - \Delta n_{I_{2j} R_{2j}} \\ \Delta R_{1j}(t) &= \Delta n_{I_{1j} R_{1j}} - \Delta n_{R_{1j}} - \Delta n_{R_{1j} S_2} \\ \Delta R_{2j}(t) &= \Delta n_{I_{2j} R_{2j}} - \Delta n_{R_{2j}} - \Delta n_{R_{2j} S_2} \\ \Delta D_{1j}(t) &= \Delta n_{I_{1j} D_{1j}} \\ \Delta D_{2j}(t) &= \Delta n_{I_{2j} D_{2j}} \end{aligned} \quad (12)$$

By taking expectations on both sides of the set of equations, dividing through by  $h$ , and taking the limit as  $h \rightarrow 0^+$ , substituting the values in the set of probability equations we obtain:

$$\begin{aligned} \frac{dS_1(t)}{dt} &= (\nu - \varphi)N(t) - \sigma_{1j}S_1(t) - \mu S_1(t) \\ \frac{dS_2(t)}{dt} &= \varphi N(t) + \varepsilon_{1j}R_{1j}(t) + \varepsilon_{2j}R_{2j}(t) - \sigma_{2j}S_2(t) - \mu S_2(t) \\ \frac{dE_{1j}(t)}{dt} &= \sigma_{1j}S_1(t) - \lambda_{1j}(t)E_{1j}(t) - \mu E_{1j}(t) \\ \frac{dE_{2j}(t)}{dt} &= \sigma_{2j}S_2(t) - \lambda_{2j}(t)E_{2j}(t) - \mu E_{2j}(t) \\ \frac{dI_{1j}(t)}{dt} &= \lambda_{1j}(t)E_{1j}(t) - \omega_{1j}I_{1j}(t) - \mu I_{1j}(t) - \gamma_{1j}I_{1j}(t) \\ \frac{dI_{2j}(t)}{dt} &= \lambda_{2j}(t)E_{2j}(t) - \omega_{2j}I_{2j}(t) - \mu I_{2j}(t) - \gamma_{2j}I_{2j}(t) \end{aligned} \quad (13)$$

$$\begin{aligned}\frac{dR_1(t)}{dt} &= \gamma_{1j}I_{1j}(t) - \mu R_{1j}(t) - \varepsilon_{1j}R_{1j}(t) \\ \frac{dR_2(t)}{dt} &= \gamma_{2j}I_{2j}(t) - \mu R_{2j}(t) - \varepsilon_{2j}R_{2j}(t) \\ \frac{dD_1(t)}{dt} &= \omega_{1j}I_{1j}(t) \\ \frac{dD_2(t)}{dt} &= \omega_{2j}I_{1j}(t)\end{aligned}$$

Stochasticity in the system was accounted for by factoring in gamma noise. The main challenge while monitoring the compartments  $S$ ,  $E$ ,  $I$ ,  $R$  and  $D$ , is that the process is evaluated based on the number of cases recorded/observed. The observed cases represent the "top layer" of the Partially Observed Markov Processes and it is modelled using a count process. Aaron A. King Dao Nguyen, and Edward L. Ionides (2016) model the number of cases,  $C(t_1, t_2)$ , recorded within a given reporting interval  $[t_1; t_2)$  using a negative binomial process,<sup>12</sup>

That is

$$C(t_1, t_2) \sim \text{NegBin}(\rho \Delta n_{SI}(t_1, t_2), \theta) \quad (14)$$

where  $\Delta n_{SI}(t_1, t_2)$  is the true incidence (the accumulated number of new infections that have occurred over the  $[t_1; t_2)$  interval),  $\rho$  is the reporting rate, (the probability that an infection is observed and recorded),  $\theta$  is the negative binomial "size" parameter.

The historical data were applied in the Exposed to the Infected ( $E \rightarrow I$ ) and the most appropriate count process for the data will be fitted. Similarly, the methodology was also applied to the number of deaths observed, given that some of the COVID-19 deaths may have been missed out in the records. This implies that we have two levels of output, the observed incidence "top layer" and the "Hidden layer".

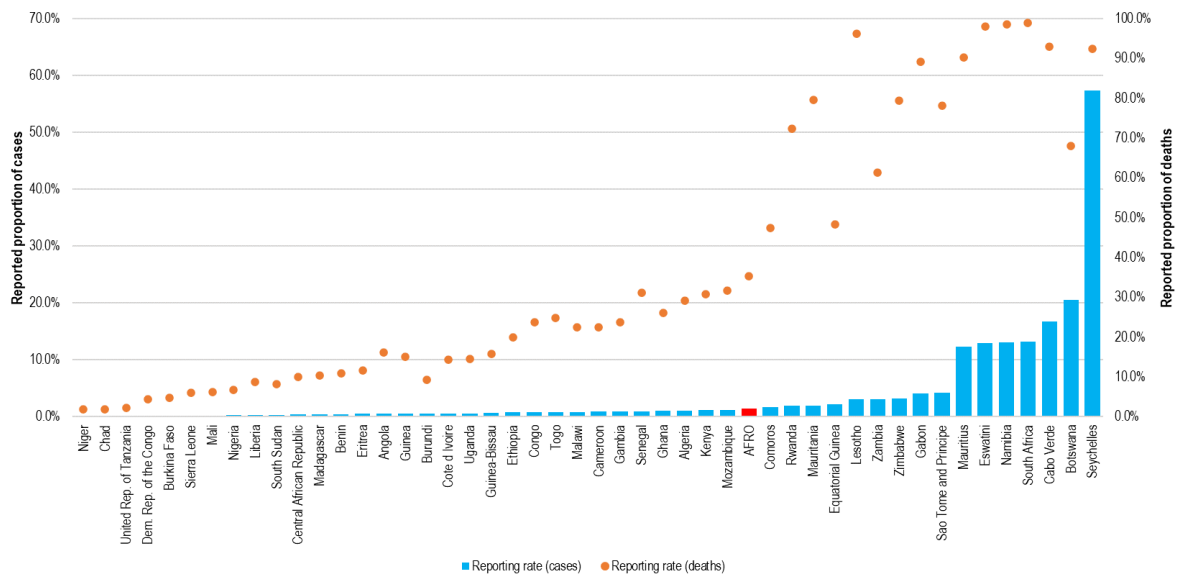

**Figure S1:** Reporting rates for the COVID-19 cases and deaths across the countries giving the proportions of the “top layer” to the “Hidden layer” (Source: Model output)

The model’s measurement component “top layer” was estimated in relation to the observed data using gradient search methods, deriving a quantity *contact rate* for each of the country. The optimization involved minimizing the difference between the observed data and the top layer of the model estimates that is directly linked to the hidden layer. Country specific contact rates were later explored and found to be dependent on, but not limited to: Population ages 0-14 (% of total), Population ages 15-64 (% of total), Population ages 65 and above (% of total), Total proportion of the population in formal employment, in services, Population living in slums (% of urban population), Proportion of population living in urban areas, Connectivity per sq km, Population density, People using at least basic sanitation services (% of population) all of which accounted for 30.7% ( $R^2 = 0.307$ ) of the variations across the countries.

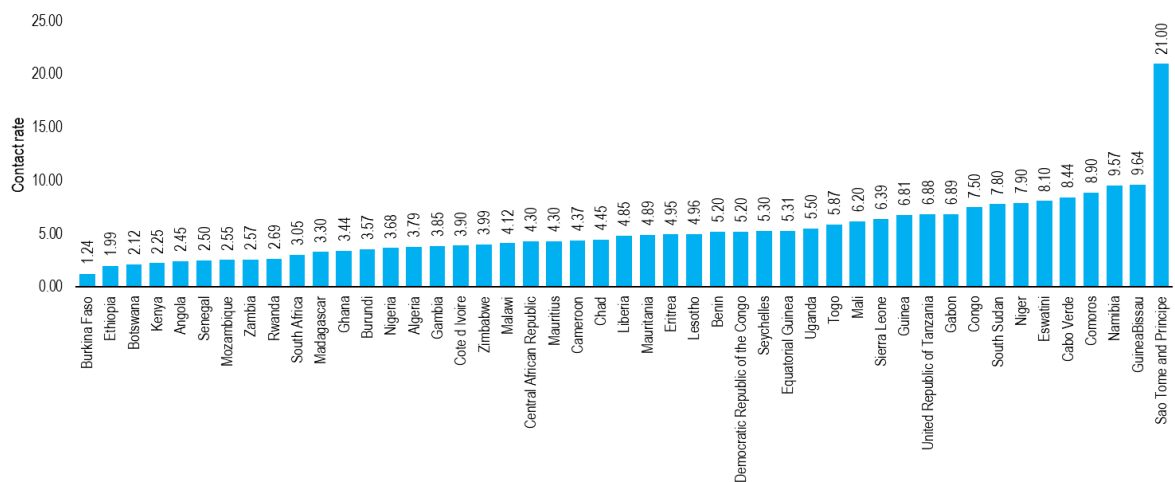

**Figure S2:** Contact rates across the 47 WHO AFRO countries



The model was sensitive to the number of COVID-19 specific deaths reported as a function of the population according to a power function

$$y = ax^b \tag{15}$$

where  $a = 48,064.9$  and  $b = -0.992$ , with  $y$  being the weight and  $x$ , the population size. Vulnerability index<sup>31</sup> for each of the countries were also used to modulate the death rates according to the country specific experience. Immunized population was determined by factoring in the vaccinated among the true burden, which was obtained from the community infections. This was done using the following formula:

$$\begin{aligned} \text{Immunized population proportion} = & \text{vaccinated proportion} * (1 - \text{True burden proportion}) \\ & + \text{True burden proportion} \end{aligned} \tag{16}$$

#### SUPPLEMENTARY APPENDIX 4

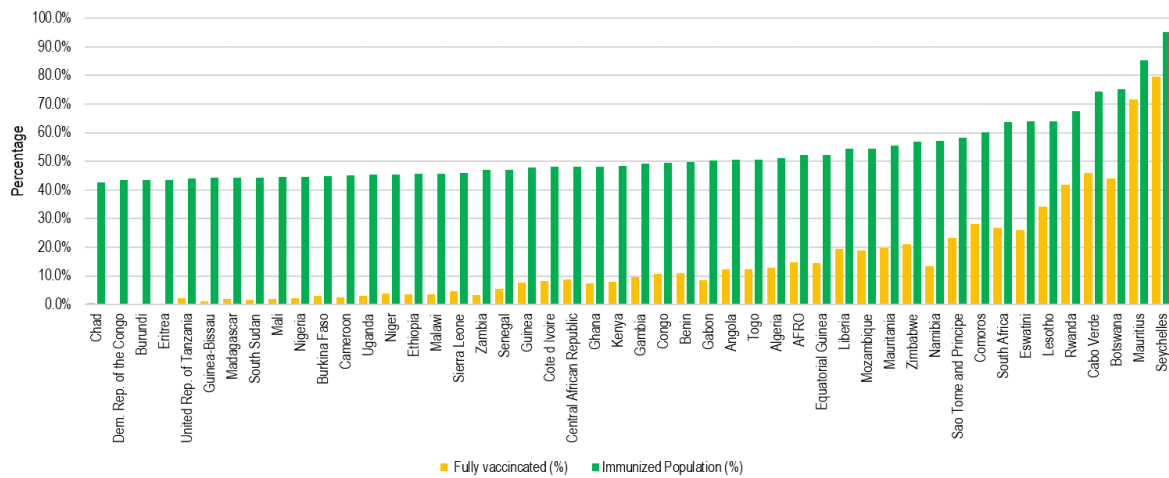

**Figure S3:** Proportions of fully vaccination vs immunized population as at Dec 31, 2021

## Regional analysis Tables

Table S4: Estimated burden and deaths per 100,000 populations across the different income groups

| Income group                       | 2020                 |                      | 2021                 |                      | 2020 and 2021        |                      |
|------------------------------------|----------------------|----------------------|----------------------|----------------------|----------------------|----------------------|
|                                    | Estimated burden     | Estimated deaths     | Estimated burden     | Estimated deaths     | Estimated burden     | Estimated deaths     |
|                                    | per 100,000 (95% CI) |
| High/Upper-Middle-Income Economies | 675 (492 - 566)      | 0.5 (0.2 - 0.7)      | 449 (328 - 402)      | 1.5 (1.0 - 1.5)      | 553 (403 - 477)      | 1.0 (0.7 - 1.1)      |
| Lower-Middle-Income Economies      | 561 (533 - 589)      | 0.2 (0.1 - 0.3)      | 390 (362 - 418)      | 0.6 (0.5 - 0.7)      | 468 (441 - 496)      | 0.4 (0.3 - 0.5)      |
| Low-Income Economies               | 538 (513 - 563)      | 0.2 (0.1 - 0.3)      | 380 (355 - 405)      | 0.5 (0.4 - 0.6)      | 453 (428 - 478)      | 0.4 (0.3 - 0.5)      |
| AFRO                               | 568 (518 - 574)      | 0.2 (0.1 - 0.3)      | 394 (354 - 410)      | 0.7 (0.5 - 0.8)      | 474 (429 - 485)      | 0.5 (0.3 - 0.6)      |

Table S5: Estimated burden and deaths per 100,000 population across the different regional blocks

| REC     | 2020                 |                      | 2021                 |                      | 2020 and 2021        |                      |
|---------|----------------------|----------------------|----------------------|----------------------|----------------------|----------------------|
|         | Estimated burden     | Estimated deaths     | Estimated burden     | Estimated deaths     | Estimated burden     | Estimated deaths     |
|         | per 100,000 (95% CI) |
| CEN-SAD | 546 (521 - 571)      | 0.2 (0.1 - 0.3)      | 385 (360 - 410)      | 0.5 (0.5 - 0.7)      | 459 (434 - 484)      | 0.4 (0.3 - 0.5)      |
| COM-ESA | 591 (498 - 547)      | 0.2 (0.1 - 0.3)      | 402 (338 - 387)      | 0.7 (0.5 - 0.7)      | 489 (411 - 461)      | 0.5 (0.3 - 0.5)      |
| EAC     | 540 (513 - 568)      | 0.1 (0.1 - 0.2)      | 381 (353 - 409)      | 0.4 (0.3 - 0.5)      | 454 (426 - 482)      | 0.3 (0.2 - 0.4)      |
| ECCA    | 544 (517 - 570)      | 0.1 (0.1 - 0.2)      | 384 (358 - 411)      | 0.4 (0.4 - 0.5)      | 457 (431 - 484)      | 0.3 (0.2 - 0.4)      |
| ECO     | 548 (522 - 574)      | 0.2 (0.1 - 0.3)      | 384 (359 - 410)      | 0.6 (0.5 - 0.7)      | 459 (434 - 485)      | 0.4 (0.3 - 0.5)      |
| WAS     | 545 (522 - 568)      | 0.1 (0.1 - 0.2)      | 379 (356 - 402)      | 0.5 (0.4 - 0.6)      | 455 (432 - 478)      | 0.3 (0.3 - 0.4)      |
| IGAD    | 612 (510 - 579)      | 0.4 (0.2 - 0.5)      | 416 (343 - 411)      | 1.1 (0.8 - 1.2)      | 506 (420 - 488)      | 0.8 (0.5 - 0.9)      |
| SADC    | 552 (526 - 578)      | 0.2 (0.1 - 0.3)      | 382 (356 - 408)      | 0.5 (0.4 - 0.6)      | 460 (434 - 486)      | 0.4 (0.3 - 0.5)      |
| UMA     | 568 (518 - 574)      | 0.2 (0.1 - 0.3)      | 394 (354 - 410)      | 0.7 (0.5 - 0.8)      | 474 (429 - 485)      | 0.5 (0.3 - 0.6)      |
| AFRO    | 568 (518 - 574)      | 0.2 (0.1 - 0.3)      | 394 (354 - 410)      | 0.7 (0.5 - 0.8)      | 474 (429 - 485)      | 0.5 (0.3 - 0.6)      |

## References

1. Cheng L, Song S, Fan Q, Shen S, Wang H, Zhou B, et al. Cross-neutralization of SARS-CoV-2 Kappa and Delta variants by inactivated vaccine-elicited serum and monoclonal antibodies. *Cell Discov.* 2021 Nov 23;7(1):1–4.
2. Homma Y, Katsuta T, Oka H, Inoue K, Toyoshima C, Iwaki H, et al. The incubation period of the SARS-CoV-2 B.1.1.7 variant is shorter than that of other strains. *J Infect.* 2021 Aug;83(2):e15–7.
3. Snell LB, Wang W, Alcolea-Medina A, Charalampous T, Nebbia G, Batra R, et al. First and second SARS-CoV-2 waves in inner London: A comparison of admission characteristics and the impact of the B.1.1.7 variant [Internet]. 2021 Mar [cited 2022 Jan 16] p. 2021.03.16.21253377. Available from: <https://www.medrxiv.org/content/10.1101/2021.03.16.21253377v1>
4. Akkiz H. Implications of the Novel Mutations in the SARS-CoV-2 Genome for Transmission, Disease Severity, and the Vaccine Development. *Front Med.* 2021;8:636532.
5. Jara A, Undurraga EA, González C, Paredes F, Fontecilla T, Jara G, et al. Effectiveness of an Inactivated SARS-CoV-2 Vaccine in Chile. *N Engl J Med.* 2021 Sep 2;385(10):875–84.
6. Levine-Tiefenbrun M, Yelin I, Katz R, Herzel E, Golan Z, Schreiber L, et al. Initial report of decreased SARS-CoV-2 viral load after inoculation with the BNT162b2 vaccine. *Nat Med.* 2021 May;27(5):790–2.
7. Mahase E. Covid-19: Vaccine advisory committee must be more transparent about decisions, say researchers. *BMJ.* 2021 Oct 7;375:n2452.
8. Marfe G, Perna S, Shukla AK. Effectiveness of COVID-19 vaccines and their challenges (Review). *Exp Ther Med.* 2021 Dec;22(6):1407.
9. Tregoning JS, Flight KE, Higham SL, Wang Z, Pierce BF. Progress of the COVID-19 vaccine effort: viruses, vaccines and variants versus efficacy, effectiveness and escape. *Nat Rev Immunol.* 2021 Oct;21(10):626–36.
10. Vasireddy D, Vanaparthi R, Mohan G, Malayala SV, Atluri P. Review of COVID-19 Variants and COVID-19 Vaccine Efficacy: What the Clinician Should Know? *J Clin Med Res.* 2021 Jun;13(6):317–25.
11. Kojima N, Shrestha NK, Klausner JD. A Systematic Review of the Protective Effect of Prior SARS-CoV-2 Infection on Repeat Infection. *Eval Health Prof.* 2021 Dec 1;44(4):327–32.
12. King AA, Nguyen D, Ionides EL. Statistical Inference for Partially Observed Markov Processes via the R Package pomp. *J Stat Softw* [Internet]. 2016 [cited 2022 Jan 16];69(12). Available from: <http://arxiv.org/abs/1509.00503>
13. United Nations Population Division. World population prospects. New York, 2019. <https://population.un.org/wpp>
